# Supplementary material
Source: Springer Nature journal article supplement (https://www.springermedizin.de/resource/supplementary/40169_2014_54_MOESM3_ESM.pdf/9675476)

**Adipocytes**

**Muse-AT cells**

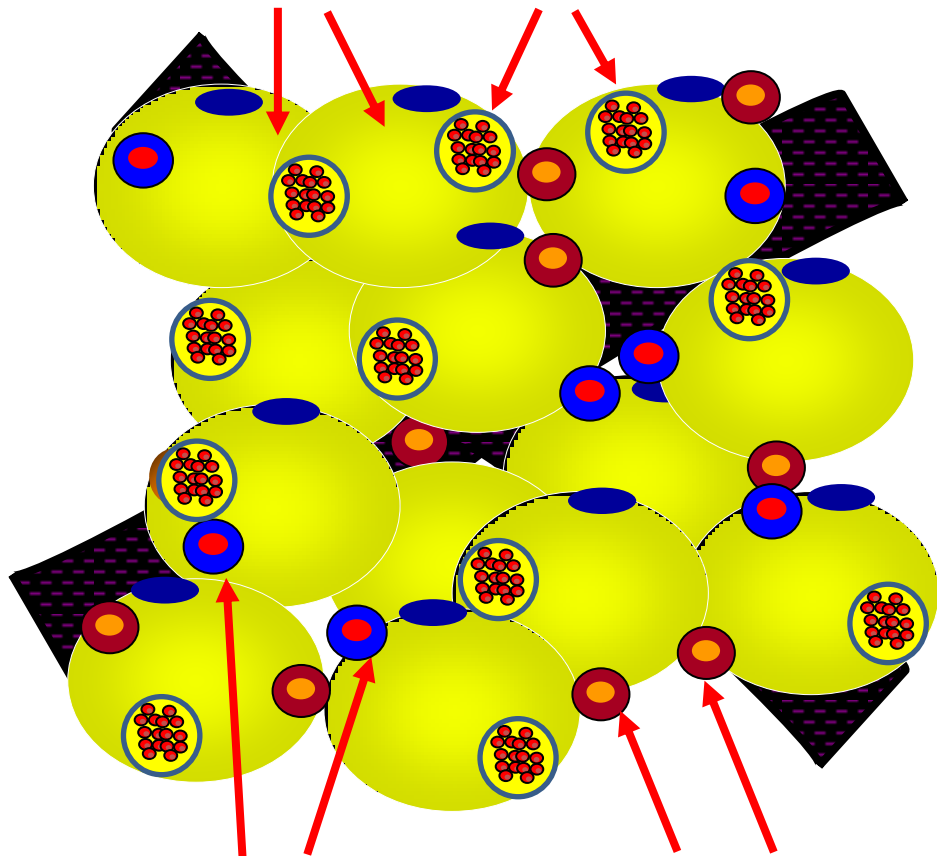

**Macrophages**

**ASCs**

Supplement: MOESM3 [file 9675476]
